# Supplementary material for: Tumor progression and chromatin landscape of lung cancer are regulated by the lineage factor GATA6
Source: PubMed Central journal article supplement (PMC7190573; doi:10.1038/s41388-020-1246-z), 2020-03-10
Supplement: 41388_2020_1246_MOESM2_ESM.pdf [file 41388_2020_1246_MOESM2_ESM.pdf]

**Supplementary Table 1.** Summary of the numbers and phenotype of GEMM experiments

| Experiment        | Sample size |                             | Summary Phenotype ( <i>Gata6</i> <sup>-/-</sup> )    |
|-------------------|-------------|-----------------------------|------------------------------------------------------|
|                   | WT          | <i>Gata6</i> <sup>-/-</sup> |                                                      |
| AdCRE K/KG        | 3           | 5                           | Decrease tumor burden                                |
| AdCRE KP/KPG      | 6           | 10                          | Decrease tumor burden                                |
| Lenti-CRE K/KG    | 5           | 6                           | Decrease tumor burden and progression                |
| Lenti-CRE KP/KPG  | 3           | 4                           | Decrease tumor burden, progression and proliferation |
| CC10-CRE K/KG     | 3           | 7                           | Decrease tumor burden                                |
| CC10-CRE KP/KPG   | 15          | 9                           | Decrease tumor burden                                |
| SPC-CRE K/KG      | 7           | 7                           | Decrease tumor burden                                |
| SPC-CRE KP/KPG    | 6           | 6                           | Decrease tumor burden                                |
| <b>TOTAL MICE</b> | <b>48</b>   | <b>54</b>                   |                                                      |
